# Supplementary material
Source: Springer Nature journal article supplement (https://www.springermedizin.de/resource/supplementary/12879_2007_762_MOESM2_ESM.pdf/9449326)

**% of shared types**

**50%**

**0%**

**<15**

**16-30**

**31-45**

**46-60**

**>61**

**Age groups**

**CASI**

**Beijing**

**Orphan types**

**Other shared types**

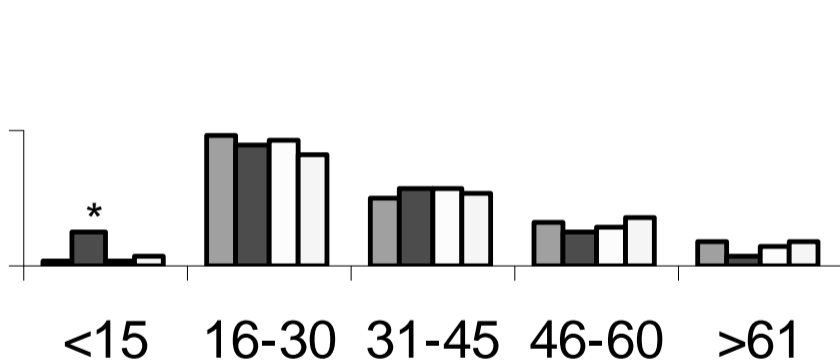

Supplement: MOESM2 [file 9449326]
